# Supplementary material
Source: publisher figshare collection journal article supplement (https://karger.figshare.com/articles/dataset/_/5127706)
Supplement: Supplementary file 1 [file 1]

Supplementary Table 1. Brain regions showing an interaction effect of Group  $\times$  Condition during anticipation phase

| Anticipation Phase | HEM | BA | Coordinates<br>(MNI) |     |    | k(volume) | Z    |
|--------------------|-----|----|----------------------|-----|----|-----------|------|
|                    |     |    | x                    | y   | z  |           |      |
| Rolandic Operculum | R   | 48 | 48                   | -6  | 22 | 130       | 4.65 |
| Insula             | R   | 48 | 34                   | -12 | 18 |           | 3.15 |
| Rolandic Operculum | R   | 48 | 46                   | 6   | 10 | 39        | 3.70 |
| Insula             | L   | 48 | -36                  | -18 | 18 | 116       | 4.14 |
| Insula             | L   | 48 | -30                  | -20 | 24 |           | 3.89 |
| Postcentral G.     | L   | 48 | -46                  | -10 | 24 | 72        | 4.21 |

Clusters of 38 contiguous voxels whose global maxima meet a  $p$  threshold of .001, uncorrected, are reported. BA = Brodmann's area; HEM = hemisphere; L = left; R = right; k = volume in voxel units; Z = maximal Z score for contrast; G. = gyrus;

Supplementary Table 2. Brain regions showing a main effect of Condition (Reward vs. Avoidance) during anticipation phase. *T* map masks of the contrasts (reward anticipation – avoidance anticipation) and (avoidance anticipation - reward anticipation) were applied in order to identify the direction of regional activations.

| Anticipation Phase                                                    | HE<br>M | BA | Coordinates |     |     | k(volume) | Z    |
|-----------------------------------------------------------------------|---------|----|-------------|-----|-----|-----------|------|
|                                                                       |         |    | (MNI)       |     |     |           |      |
|                                                                       |         |    | x           | y   | z   |           |      |
| <i>Main Effect of Condition masked by (Reward – Avoidance) T map</i>  |         |    |             |     |     |           |      |
| Ant. Cingulate G/ Ventromedial PFC                                    | L       | 11 | -2          | 36  | -8  | 632       | 4.80 |
| Mid. Frontal G.                                                       | L       | 46 | -30         | 42  | 32  | 82        | 4.69 |
| Sup. Frontal G.                                                       | L       | 9  | -14         | 48  | 36  | 80        | 4.42 |
| Sup. Frontal G.                                                       | L       | 9  | -14         | 34  | 52  | 98        | 4.28 |
| Mid. Cingulate G.                                                     | R       | 23 | 4           | -12 | 50  | 108       | 4.00 |
| Rolandic Operculum                                                    | R       | 48 | 48          | -8  | 20  | 84        | 4.53 |
| Hippocampus                                                           | R       | 20 | 28          | -16 | -18 | 56        | 3.97 |
| Mid. Temporal G.                                                      | L       | 22 | -64         | -42 | 4   | 451       | 4.58 |
| Mid. Temporal G.                                                      | L       | 21 | -60         | -6  | -20 | 40        | 4.42 |
| Sup. Temporal G.                                                      | R       | 48 | 50          | -8  | 4   | 193       | 4.01 |
| Sup. Temporal G.                                                      | R       | 41 | 46          | -36 | 18  | 131       | 4.41 |
| Angular G.                                                            | L       | 39 | -40         | -62 | 22  | 75        | 3.79 |
| Precuneus G.                                                          | L       |    | 0           | -58 | 34  | 87        | 3.53 |
| <i>Main Effect of Condition masked by (Avoidance – Reward ) T map</i> |         |    |             |     |     |           |      |
| Supp. Motor Area/Sup. Med. Frontal G.                                 | R       | 8  | 4           | 22  | 52  | 461       | 4.62 |
| Mid. Frontal G.                                                       | R       | 6  | 48          | 10  | 42  | 282       | 4.07 |
| Precentral G.                                                         | L       | 6  | -40         | 0   | 50  | 238       | 4.48 |
| Insula/ Inf. Frontal G.                                               | R       | 48 | 34          | 22  | 6   | 398       | 4.49 |
| Insula                                                                | L       | 47 | -32         | 22  | -4  | 41        | 3.73 |
| Caudate                                                               | R       |    | 12          | 4   | 12  | 203       | 4.33 |
| Caudate                                                               | L       |    | -8          | 6   | 12  | 38        | 3.18 |
| Precuneus G.                                                          | R       | 7  | 10          | -72 | 46  | 40        | 4.17 |
| Inf. Parietal G.                                                      | L       | 7  | -32         | -58 | 54  | 65        | 3.54 |

Clusters of 38 contiguous voxels whose global maxima meet a *p* threshold of .001, uncorrected, are reported. BA = Brodmann's area; HEM = hemisphere; L = left; R = right; k = volume in voxel units; Z = maximal Z score for contrast; Ant. = anterior; Med. = medial; Mid. = middle; Sup. = superior; Inf. = inferior; Supp. = supplementary; G. = gyrus.

Supplementary Table 3. Brain regions showing a main effect of Condition (Reward vs. Avoidance) during reception phase. *T* map masks of the contrasts (reward reception – avoidance reception) and (avoidance reception - reward reception) were applied in order to identify the direction of regional activations..

| Reception Phase                                                         | HE<br>M | BA | Coordinates<br>(MNI) |     |     | k(volume) | Z    |
|-------------------------------------------------------------------------|---------|----|----------------------|-----|-----|-----------|------|
|                                                                         |         |    | x                    | y   | z   |           |      |
|                                                                         |         |    |                      |     |     |           |      |
| <i>Main Effect of Condition masked with (Reward – Avoidance ) T map</i> |         |    |                      |     |     |           |      |
| Inf. Orbitofrontal G.                                                   | R       | 38 | 46                   | 20  | -12 | 408       | 5.84 |
| Inf. Orbitofrontal G.                                                   | L       | 38 | -44                  | 18  | -12 | 312       | 5.17 |
| Sup. Frontal G.                                                         | L       | 9  | -18                  | 56  | 28  | 51        | 5.54 |
| Sup. Frontal G./Ant. Cingulate                                          | R       | 9  | 18                   | 58  | 28  | 529       | 4.83 |
| Sup. Medial Frontal G.                                                  | R       | 8  | 10                   | 32  | 60  | 111       | 4.50 |
| Mid. Cingulate G.                                                       | R       | 23 | 2                    | -28 | 34  | 72        | 3.96 |
| Mid. Temporal G.                                                        | R       | 21 | 62                   | -36 | -4  | 60        | 3.91 |
| Caudate                                                                 | L       |    | -12                  | 2   | 14  | 174       | 5.00 |
| Caudate                                                                 | R       |    | 12                   | -2  | 16  | 144       | 4.24 |
| Hippocampus G.                                                          | L       | 30 | -18                  | -28 | -10 | 251       | 4.37 |
| Precuneus G.                                                            | R       | 7  | 4                    | -74 | 38  | 78        | 3.78 |
| Angular G.                                                              | L       | 39 | -52                  | -62 | 32  | 48        | 3.73 |
| Cerebellum                                                              | R       | 19 | 30                   | -74 | -20 | 7402      | 7.71 |
| <i>Main Effect of Condition masked with (Avoidance –Reward) T map</i>   |         |    |                      |     |     |           |      |
| Sup. Frontal G.                                                         | L       | 32 | -16                  | 20  | 50  | 64        | 4.13 |
| Caudate                                                                 | L       |    | -16                  | 32  | 10  | 1026      | 4.41 |
| Hippocampus G.                                                          | L       | 35 | -24                  | -12 | -20 | 154       | 4.89 |
| Hippocampus G.                                                          | R       | 20 | 26                   | -14 | -20 | 65        | 4.85 |
| Thalamus                                                                | L       |    | -14                  | -24 | 0   | 190       | 4.99 |
| Thalamus                                                                | R       |    | 8                    | -26 | -2  | 178       | 4.81 |
| Sup. Parietal G.                                                        | L       | 7  | -20                  | -62 | 58  | 38147     | 6.80 |
| Cerebellum                                                              | R       |    | 26                   | -46 | -50 | 57        | 4.26 |
| Cerebellum                                                              | R       |    | 12                   | -68 | -26 | 62        | 3.95 |
| Cerebellum                                                              | R       |    | 4                    | -32 | -38 | 39        | 3.86 |

Clusters of 38 contiguous voxels whose global maxima meet a *p* threshold of .001, uncorrected, are reported. BA = Brodmann's area; HEM = hemisphere; L = left; R = right; k = volume in voxel units; Z = maximal Z score for contrast; Inf. = inferior; Sup. = superior; Mid. = middle; Ant. = anterior; Supp. = supplementary; G. = gyrus.
